# Supplementary material for: CCL5 mediates target‐kinase independent resistance to FLT3 inhibitors in FLT3‐ITD‐positive AML
Source: PubMed Central journal article supplement (PMC7138400; doi:10.1002/1878-0261.12640), 2020-02-13

# Suppl. Figure 1

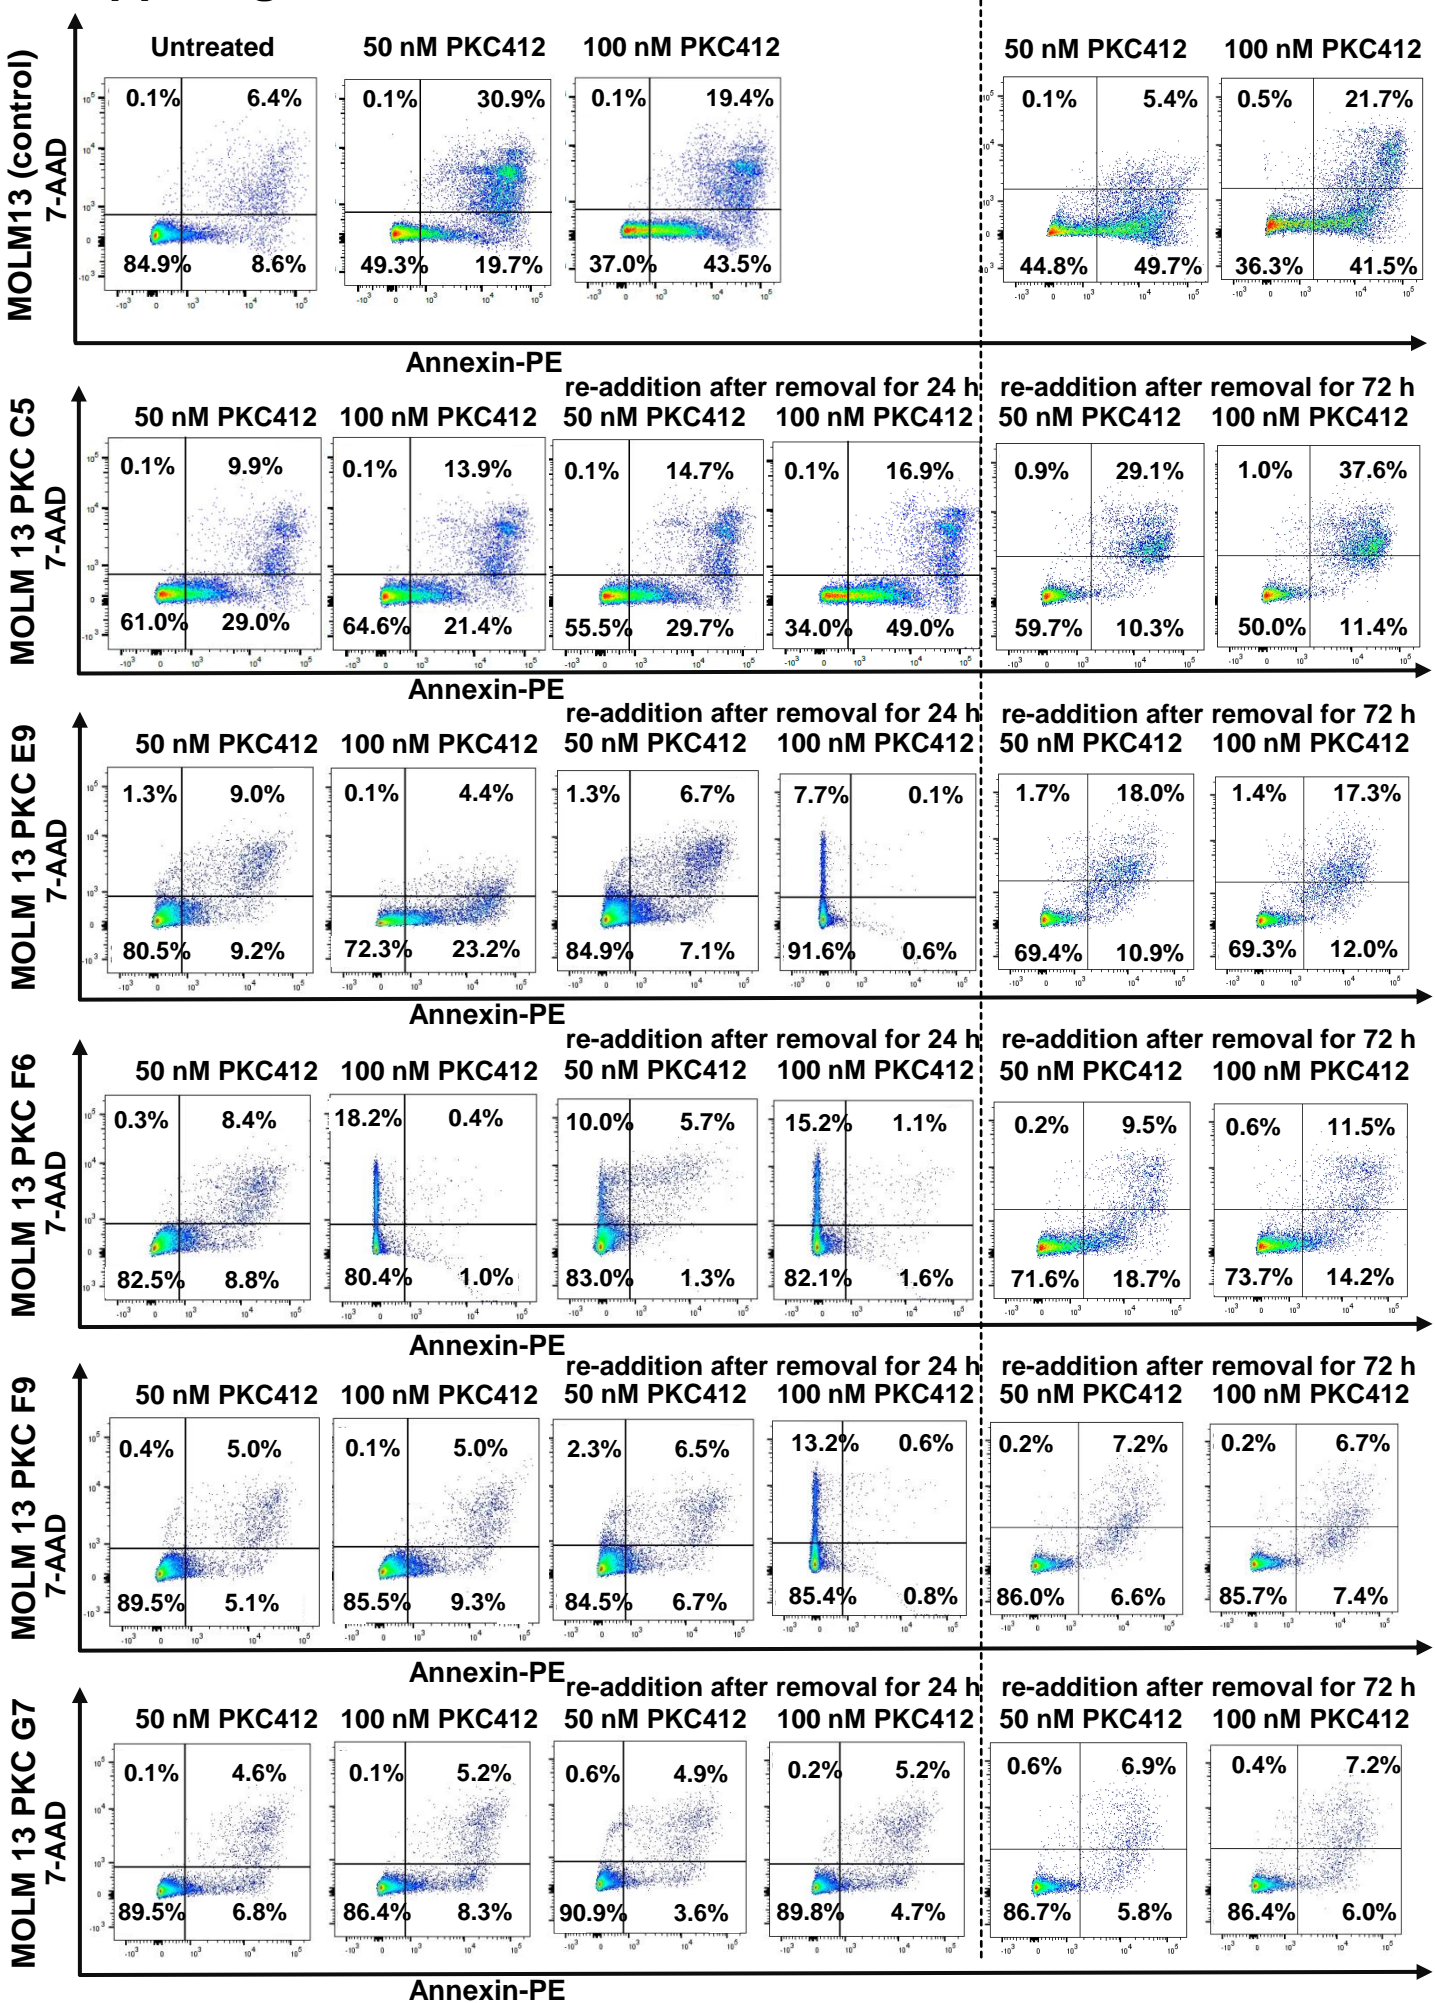

Supplement: MOL2-14-779-s001.pdf [file MOL2-14-779-s001.pdf]
